# Supplementary material for: Stability of Cs/Ru/MgO Catalyst for Ammonia Synthesis as a Hydrogen and Energy Carrier
Source: MDPI journal article supplement (doi:10.3390/en15103506), 2022-05-11
Supplement: s1 [file s1]

Archive with 1 entries (1 files):
- energies-1701344-supplementary.pdf
