# Supplementary material for: Stability of Cs/Ru/MgO Catalyst for Ammonia Synthesis as a Hydrogen and Energy Carrier
Source: MDPI journal article supplement (doi:10.3390/en15103506), 2022-05-11
Supplement: s1 [file s1 › energies-1701344-supplementary.pdf]

## Supporting Information

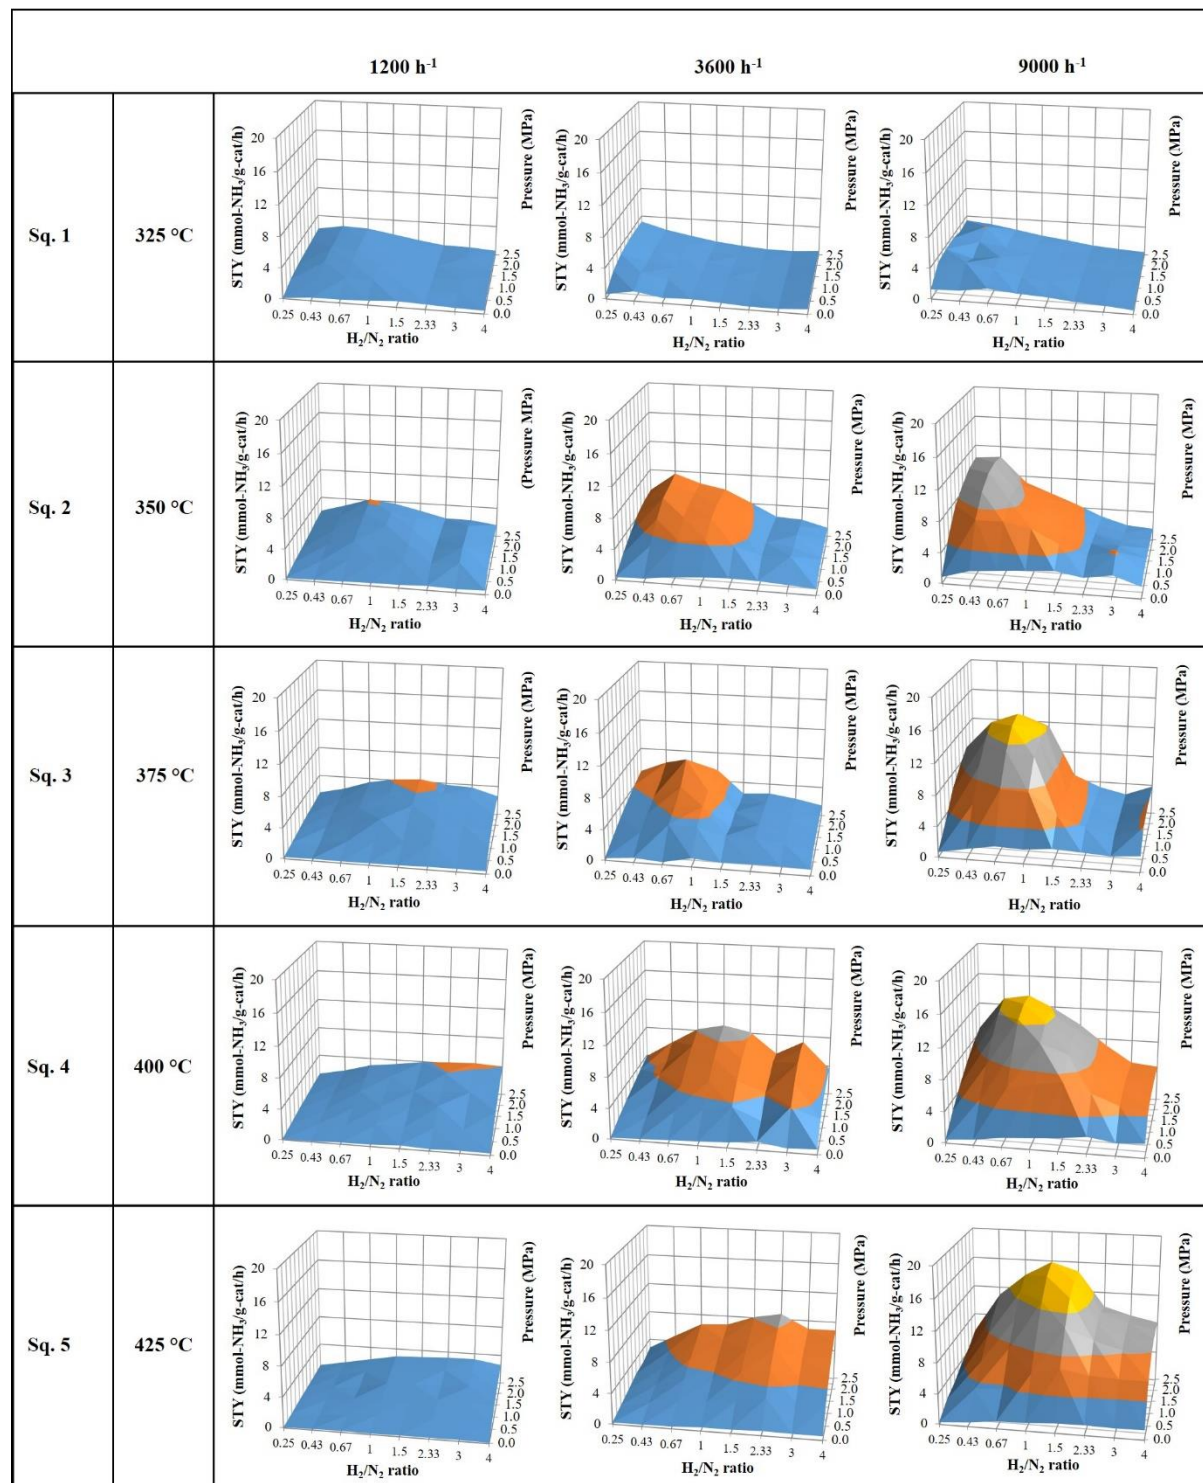

**Figure S1.** Effect of reaction conditions on space-time yield (STY) of Cs/Ru/MgO catalyst for ammonia synthesis. Reference from our previously published paper [20].
